# Supplementary material for: Comparison of Laboratory and Daily-Life Gait Speed Assessment during ON and OFF States in Parkinson’s Disease
Source: MDPI journal article supplement (doi:10.3390/s21123974), 2021-06-09
Supplement: s1 [file s1]

Supplementary Materials:

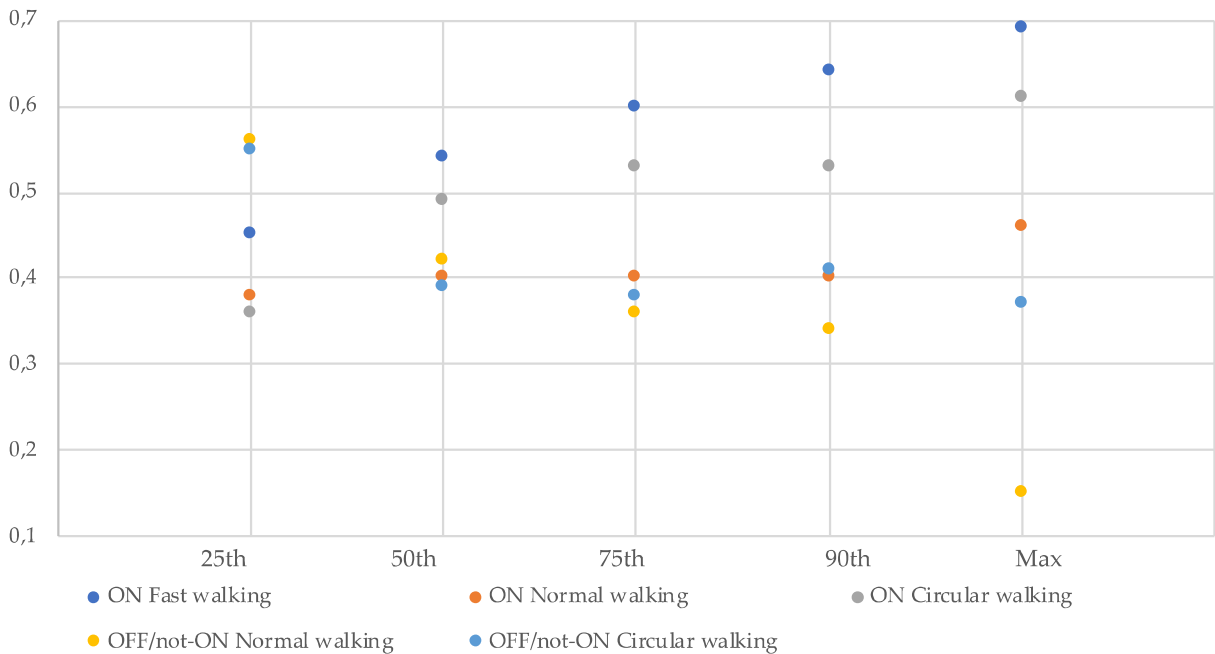

**Figure S1.** Correlation of ON and OFF/not-ON state between the lab and the most relevant percentiles of domestic environment.

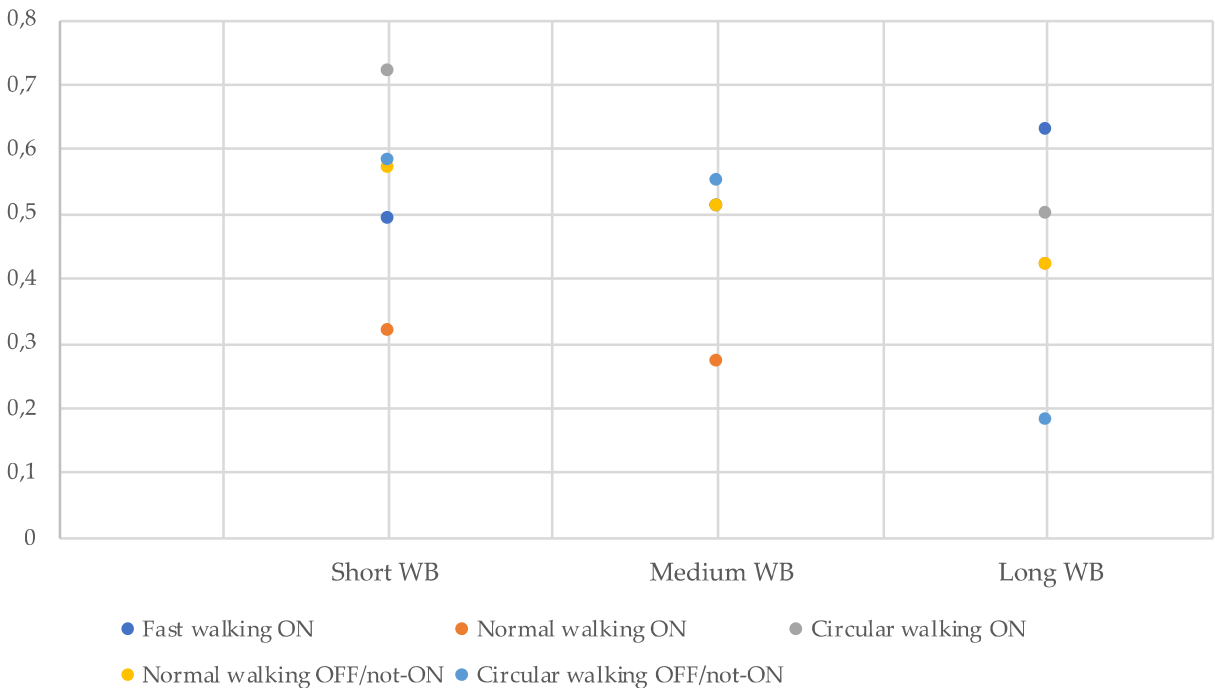

**Figure S2.** Correlation of ON and OFF/not-ON state between the lab and the most relevant WBs of domestic environment.

**Table S1:** Demographic data of the patients included and excluded in the analysis

| Variables                | Included patients (27)               | Excluded patients (12)      | <i>p</i> value |
|--------------------------|--------------------------------------|-----------------------------|----------------|
| Male:female              | 16:11                                | 8:4                         | -              |
| Age [years]              | 69 [64 : 73]                         | 65 [61 : 74]                | 0.13           |
| Disease duration [years] | 6 [3 : 9]                            | 4 [2 : 8]                   | 0.3            |
| Disease onset [years]    | 64 [57 : 69]                         | 60 [53 : 69]                | 0.41           |
| H&Y stage                | ON: 2<br>OFF: 2                      | 2<br>2                      | 0.39<br>0.06   |
| UPDRS I                  | 2 [1 : 4]                            | 1 [1 : 2]                   | 0.13           |
| UPDRS II                 | 7 [3 : 10]                           | 4 [4 : 7]                   | 0.23           |
| UPDRS III                | ON: 12 [8 : 20]<br>OFF: 22 [15 : 31] | 14 [8 : 21]<br>22 [14 : 33] | 0.5<br>0.72    |
| UPDRS IV                 | 2 [0 : 3]                            | 2 [0 : 3]                   | 0.51           |
| Total LED [mg]           | 580 [400 : 770]                      | 540 [380 : 617]             | 0.36           |

Results are expressed in median and interquartile range [IQR].

**Table S2:** Correlation of ON and OFF / not-ON states between the lab and the domestic environment

| LAB    | Straight walking fast pace |         |                | Straight walking normal pace |       |                |                  |        |                | Circular walking |        |                |                  |        |                |
|--------|----------------------------|---------|----------------|------------------------------|-------|----------------|------------------|--------|----------------|------------------|--------|----------------|------------------|--------|----------------|
|        | ON                         |         |                | ON                           |       |                | OFF              |        |                | ON               |        |                | OFF              |        |                |
| HOME   | P                          | r       | R <sup>2</sup> | P                            | r     | R <sup>2</sup> | P                | r      | R <sup>2</sup> | P                | r      | R <sup>2</sup> | P                | r      | R <sup>2</sup> |
|        | 25 <sup>th</sup>           | 0.45*   | 20             | 25 <sup>th</sup>             | 0.38  | 14             | 25 <sup>th</sup> | 0.38*  | 14             | 25 <sup>th</sup> | 0.36   | 13             | 25 <sup>th</sup> | 0.43*  | 18             |
| ON     | Max                        | 0.69*** | 30             | Max                          | 0.40* | 16             | Max              | 0.5*   | 13             | Max              | 0.61** | 39             | Max              | 0.57** | 27             |
| Not-ON | 25 <sup>th</sup>           | 0.49*   | 24             | 25 <sup>th</sup>             | 0.44* | 19             | 25 <sup>th</sup> | 0.56** | 33             | 25 <sup>th</sup> | 0.55** | 30             | 25 <sup>th</sup> | 0.55** | 31             |
|        | Max                        | 0.47*   | 22             | Max                          | 0.26  | 7              | Max              | 0.15   | 2              | Max              | 0.41*  | 17             | Max              | 0.37   | 14             |

Degrees of correlation (r) and coefficients of determination (R<sup>2</sup>) between lab tests and most relevant percentiles (P) of gait speed in the domestic environment during ON and OFF / not-ON medication state. \*p<0.05, \*\*p<0.01, \*\*\*p<0.001.

**Table S3:** Characteristics of WB during ON and OFF / not-ON medication states.

|                               | ON   |               | Not-ON |              | <i>p</i> value |
|-------------------------------|------|---------------|--------|--------------|----------------|
| Time of ON and not-ON [hours] | 5    | [4 : 6]       | 2.5    | [2 : 3]      | <0.001         |
| Walking time [%]              | 15.3 | [10.4 : 26.3] | 15.8   | [9.3 : 18.7] | 0.48           |
| Total Short WB [N]            | 26   | [11 : 42]     | 12     | [7 : 23]     | 0.002          |
| Short WB [N/h]                | 5.7  | [3.4 : 7.5]   | 4.3    | [2.8 : 9.4]  | 0.67           |
| Total Medium WB [N]           | 9    | [7 : 14]      | 5      | [1 : 7]      | <0.001         |
| Medium WB [N/h]               | 2.3  | [1.4 : 2.9]   | 1.7    | [0.5 : 2.6]  | 0.27           |
| Total Long WB [N]             | 5    | [2 : 9]       | 2      | [1 : 4]      | 0.024          |
| Long WB [N/h]                 | 1.3  | [0.7 : 1.7]   | 0.7    | [0.3 : 1.6]  | 0.51           |

Values are expressed in median [IQR].
